# Supplementary material
Source: publisher figshare collection journal article supplement (https://gsajournals.figshare.com/ndownloader/files/20076974)
Supplement: Supplementary file 1 [file 20076974]

## Sheet: Key
Column Title	Description
Transciption Factor gene	Wormbase gene public name
Loci	Wormbase gene sequence name
Wormbase ID	Wormbase gene sequence ID
Binary HTA Suppression in lin-54	Do RNAi of TFs indicated show suppression of HTA in lin-54 mutants

## Sheet: S1
Transcription Factor Gene	Loci	WormBase Gene ID	Transcription Factor Family	Binary HTA Suppression in lin-54
aptf-1	K06A1.1	WBGene00019424	AP-2	No
athp-1	C44B9.4	WBGene00008081	AT Hook x2	No
C27A2.7	C27A2.7	WBGene00044386	ZF - C2H2	No
C32D5.1	C32D5.1	WBGene00016310	NOVEL	No
C34D1.1	C34D1.1	WBGene00007929	ZF - DM	No
C46E10.8	C46E10.8	WBGene00016712	ZF - C2H2 - 1 finger	No
ceh-1	F16H11.4	WBGene00000428	HD	Yes
ceh-10	W03A3.1	WBGene00000435	HD - PRD	No
ceh-14	F46C8.5	WBGene00000438	HD - LIM	No
ceh-17	D1007.1	WBGene00000440	HD - PRD	No
ceh-18	ZC64.3	WBGene00000441	HD - POU	No
ceh-19	F20D12.6	WBGene00000442	HD - HOX	No
ceh-21	T26C11.6	WBGene00000444	HD - CUT	No
ceh-31	C33D12.1	WBGene00000452	HD - NK	No
ceh-36	C37E2.4	WBGene00000457	HD - PRD	No
ceh-37	C37E2.5	WBGene00000458	HD - PRD	No
ceh-38	F22D3.1	WBGene00000459	HD - CUT	Yes
ceh-39	T26C11.7	WBGene00000460	HD - CUT	Yes
ceh-43	C28A5.4	WBGene00000463	HD - NK	Yes
ceh-48	C17H12.9	WBGene00015934	HD - CUT	No
ceh-6	K02B12.1	WBGene00000431	HD - POU	No
ceh-8	ZK265.4	WBGene00000433	HD - PRD - 2 domains	No
cep-1	F52B5.5	WBGene00000467	p53	No
cog-1	R03C1.3	WBGene00000584	HD - NK	No
D1005.3	D1005.3	WBGene00016997	bZIP	No
dac-1	B0412.1	WBGene00000895	WH - DAC	No
daf-16	R13H8.1	WBGene00000912	WH - Fork Head, AT Hook	No
die-1	C18D1.1	WBGene00000995	ZF - C2H2 - 3 fingers	No
dmd-3	Y43F8C.10	WBGene00012832	ZF - DM	No
dmd-4	C27C12.6	WBGene00007776	ZF - DM	No
dmd-5	F10C1.5	WBGene00017326	ZF - DM	Yes
dmd-6	F13G11.1	WBGene00007058	ZF - DM	Yes
dpy-20	T22B3.1	WBGene00001079	ZF - BEDx2	No
dsc-1	C18B12.3	WBGene00001096	HD - PRD	Yes
egl-5	C08C3.1	WBGene00001174	HD - HOX	No
elt-1	W09C2.1	WBGene00001249	ZF - GATA - 2 domains	No
elt-6	F52C12.5	WBGene00001253	ZF - GATA	No
F10B5.3	F10B5.3	WBGene00008640	ZF - C2H2 - 4 fingers	No
F26H9.2	F26H9.2	WBGene00009174	RPEL - 2 domains	No
fkh-2	T14G12.4	WBGene00001434	WH - Fork Head	Yes
fkh-9	K03C7.2	WBGene00001441	WH - Fork Head	No
flh-1	Y11D7A.12	WBGene00012435	ZF - FLYWCH	No
flh-2	C26E6.2	WBGene00016138	ZF - FLYWCH	Yes
gei-3	T22H6.6	WBGene00001560	HMG box	Yes
H02I12.5	H02I12.5	WBGene00010353	NOVEL	No
hel-1	C26D10.2	WBGene00001840	NOVEL	No
hlh-27	C17C3.10	WBGene00001966	bHLH	No
hmg-12	Y17G7A.1	WBGene00001977	AT Hook x7	No
hsf-1	Y53C10A.12	WBGene00002004	WH - HSF	No
klf-2	F53F8.1	WBGene00009998	ZF - C2H2 - 3 fingers	No
lim-4	ZC64.4	WBGene00002987	HD - LIM	Yes
lin-11	ZC247.3	WBGene00003000	HD - LIM	Yes
lin-39	C07H6.7	WBGene00003024	HD - HOX	No
lsy-2	F49H12.1	WBGene00003087	ZF - C2H2 - 5 fingers	No
mab-5	C08C3.3	WBGene00003102	HD - HOX	Yes
mab-9	T27A1.6	WBGene00003106	T-box	No
madf-1	Y55F3BR.5	WBGene00021942	MADF	No
mbr-1	T01C1.2	WBGene00011315	HTH	No
mec-3	F01D4.6	WBGene00003167	HD - LIM	Yes
mig-5	T05C12.6	WBGene00003241	WH	Yes
mls-2	C39E6.4	WBGene00003377	HD - NK	No
nfi-1	ZK1290.4	WBGene00003592	MH1	No
nhr-1	R09G11.2	WBGene00003600	ZF - NHR	No
nhr-102	T06C12.6	WBGene00003692	ZF - NHR	No
nhr-105	C06G3.1	WBGene00003695	ZF - NHR	No
nhr-17	C02B4.2	WBGene00003616	ZF - NHR	No
nhr-20	F43C1.4	WBGene00003619	ZF - NHR	Yes
nhr-23	C01H6.5	WBGene00003622	ZF - NHR	No
nhr-270	R13D11.8	WBGene00020062	ZF - NHR	No
nhr-34	F58G6.5	WBGene00003627	ZF - NHR	No
nhr-4	F32B6.1	WBGene00003603	ZF - NHR	No
nhr-47	C24G6.4	WBGene00003637	ZF - NHR	Yes
nhr-49	K10C3.6	WBGene00003639	ZF - NHR	No
nhr-5	Y73F8A.21	WBGene00003604	ZF - NHR	No
nhr-6	C48D5.1	WBGene00003605	ZF - NHR	No
nhr-66	T09A12.4	WBGene00003656	ZF - NHR	No
nhr-69	T23H4.2	WBGene00003659	ZF - NHR	No
nhr-7	F54D1.4	WBGene00003606	ZF - NHR	No
nhr-72	C17A2.8	WBGene00003662	ZF - NHR	No
nhr-92	Y41D4B.8	WBGene00003682	ZF - NHR	No
odr-7	T18D3.2	WBGene00003854	ZF - NHR	Yes
pag-3	F45B8.4	WBGene00003909	ZF - C2H2 - 5 fingers	Yes
pal-1	C38D4.6	WBGene00003912	HD - HOX	No
pax-3	F27E5.2	WBGene00003939	HD - PRD, Paired Domain - FULL	No
peb-1	T14F9.4	WBGene00003968	ZF - FLYWCH	No
pha-4	F38A6.1	WBGene00004013	WH - Fork Head	No
php-3	Y75B8A.1	WBGene00004024	HD - HOX	No
pie-1	Y49E10.14	WBGene00004027	ZF - CCCH - 2 domains	No
pqm-1	F40F8.7	WBGene00004096	ZF - C2H2 - 3 fingers	No
R06C1.6	R06C1.6	WBGene00011060	NOVEL	No
R06F6.6	R06F6.6	WBGene00011069	HD - HOX	No
R07H5.10	R07H5.10	WBGene00011130	bZIP	No
ref-2	C47C12.3	WBGene00004335	ZF - C2H2 - 3 fingers	No
sel-7	K04G11.2	WBGene00004764	NOVEL	No
sem-4	F15C11.1	WBGene00004773	ZF - C2H2 - 7 fingers	No
sex-1	F44A6.2	WBGene00004786	ZF - NHR	No
sma-4	R12B2.1	WBGene00004858	MH1	No
somi-1	M04G12.4	WBGene00010868	ZF - C2H2 - 1 finger	No
sox-2	K08A8.2	WBGene00004949	HMG box	No
sox-3	F40E10.2	WBGene00004950	HMG box	No
syd-9	ZK867.1	WBGene00044068	ZF - C2H2 - 4 fingers	No
T07C12.11	T07C12.11	WBGene00011575	MADF	No
tbx-11	F40H6.4	WBGene00006547	T-box	No
tbx-33	Y66A7A.8	WBGene00006552	T-box	No
tbx-8	T07C4.2	WBGene00006545	T-box	Yes
tbx-9	T07C4.6	WBGene00006546	T-box	Yes
unc-130	C47G2.2	WBGene00006853	WH - Fork Head	No
unc-3	Y16B4A.1	WBGene00006743	IPT/TIG	No
unc-30	B0564.10	WBGene00006766	HD - PRD	No
unc-4	F26C11.2	WBGene00006744	HD - PRD	No
unc-42	F58E6.10	WBGene00006778	HD - PRD	Yes
unc-86	C30A5.7	WBGene00006818	HD - POU	No
vab-15	R07B1.1	WBGene00006881	HD - NK	No
vab-3	F14F3.1	WBGene00006870	HD - PRD	Yes
Y53C10A.3	Y53C10A.3	WBGene00013134	WH - HSF - 2 domains	No
Y57G11C.25	Y57G11C.25	WBGene00013319	ZF - CCCH - 2 domains	No
ZC204.12	ZC204.12	WBGene00022562	NOVEL	No
zip-4	Y44E3B.1	WBGene00021552	bZIP	No
ztf-1	F54F2.5	WBGene00018833	ZF - C2H2 - 4 fingers	Yes
ztf-19	T27B1.2	WBGene00003933	ZF - C2H2 - 3 fingers	No
ztf-2	F13G3.1	WBGene00008762	ZF - C2H2 - 3 fingers	No
ztf-6	W06H12.1	WBGene00012317	ZF - C2H2 - 2 fingers	Yes
ztf-8	ZC395.8	WBGene00022598	ZF - C2H2 - 3 fingers	Yes
